# Supplementary material for: On the remarkable structural diversity and kinetic lability of TpC*CaX complexes (X = NSi2Me6, OC6H4-p-Me, TpC*) where TpC* = tris[3-(2-methoxy-1,1-dimethylethyl)pyrazolyl]hydroborate
Source: Royal Society of Chemistry journal article supplement (doi:10.1039/b818375a), 2009-01-01
Supplement: b818375a.pdf [file b818375a.pdf]

## Supporting Information

### On the Remarkable Structural Diversity and Kinetic Lability of $\text{Tp}^{\text{C}*}\text{CaX}$ Complexes ( $\text{X} = \text{NSi}_2\text{Me}_6$ , $\text{OC}_6\text{H}_4\text{-p-Me}$ , $\text{Tp}^{\text{C}*}$ ) where $\text{Tp}^{\text{C}*} = \text{tris}[3\text{-(2-methoxy-1,1-dimethylethyl)pyrazolyl}]\text{hydroborate}$ .

Malcolm H. Chisholm\*, Judith C. Gallucci, Gülşah Yaman and Tanya Young.  
Department of Chemistry  
The Ohio State University  
100 W. 18<sup>th</sup> Ave.  
Columbus, Ohio 43210  
USA

General Considerations. The manipulation of air sensitive compounds employed standard Schlenk line techniques and involved the use of anhydrous solvents and dry, deoxygenated nitrogen.  $\text{TiTp}^{\text{C}*}$  was prepared as described previously.<sup>1</sup>  $\text{Ca}[\text{N}(\text{SiMe}_3)_2](\text{THF})_2$  was prepared according to the literature procedure.<sup>2</sup> Dimethylmagnesium,  $\text{MgMe}_2$ , was prepared according to the literature procedure.<sup>3</sup> Dibutylmagnesium,  $\text{MgBu}_2$ , was obtained from Aldrich.

Caution. *Thallium metal and its salts are toxic. Extreme care must be employed in the handling of these materials and in disposing of their wastes.*

Measurements.  $^1\text{H}$ -,  $^{11}\text{B}$ -, and  $^{13}\text{C}\{^1\text{H}\}$ -NMR spectra were recorded in benzene- $\text{d}_6$ , toluene- $\text{d}_8$ , THF- $\text{d}_8$  or chloroform- $\text{d}$  on Bruker NMR spectrometers DPX-500, DPX-400 or DPX-250. Elemental analyses for C, H and N were performed by Atlantic Microlab, Inc.

#### X-ray Structure Determinations.

X-ray diffraction data for compounds **2**, **3** and **4** were collected on a Nonius diffractometer equipped with a Kappa CCD detector. Because of the small size of the crystal for compound **1**, a synchrotron data set was collected at the Advanced Photon Source at Argonne National Laboratory.<sup>4</sup> Crystal data, data collection, and refinement parameters are summarized in Table

S1. All work was done at low temperature using an Oxford Cryosystems Cryostream Cooler. The structures were solved using direct methods in SHELXS-97<sup>5</sup> or SIR2004<sup>6</sup> and standard difference map techniques. Full-matrix least-squares refinements based on  $F^2$  were performed in SHELXL-97,<sup>7</sup> as incorporated in the WinGX package.<sup>8</sup> Hydrogen atoms on carbon were included in calculated positions.

*Calcium tris-[3-(2-methoxy-1,1-dimethylethyl)pyrazolyl]hydroborate bistrimethylsilylamide,  $Tp^C \cdot CaN(SiMe_3)_2$ , 1.* A solution of  $TiTp^C$  (0.953 g, 1.41 mmol) in 40 ml pentane was added dropwise to the solution of  $Ca[N(SiMe_3)_2]_2 \cdot (THF)_2$  (0.712 g, 1.41 mmol) in 30 ml pentane at 0°C.  $Tp^C \cdot CaN(SiMe_3)_2$  quickly precipitated as a white solid. The ice-water bath was removed and then the reaction mixture was stirred at room temperature overnight to make sure it is complete. Then, the reaction mixture was centrifuged, and then filtered by Schlenk filtration. The solid was washed with cold pentane twice in order to remove  $TiN(SiMe_3)_2$ , and dried under vacuum.  $Tp^C \cdot CaN(SiMe_3)_2$  was obtained as an off-white solid (0.766 g, 81 %). It is redissolved in n-hexane and the single crystals were obtained from cooling of the warm hexane solution overnight.  $^1H$ -NMR (400 MHz, benzene- $d_6$ )  $\delta$ : 7.89 (H-5, pz, s, 3H), 5.86 (H-4, pz, s, 3H), 3.50( $CH_2O$ , s, 6H), 3.23 (OMe, s, 9H), 1.18 ( $CMe_2$ , s, 18 H), 0.336 ( $SiMe_3$ , s, 18H).  $^{13}C\{^1H\}$ -NMR (400 MHz, benzene- $d_6$ )  $\delta$ : 159.1(3-C, pz), 136.0 (5-C, pz), 101.2 (4-C, pz), 82.97( $CH_2O$ ), 60.97 ( $OCH_3$ ), 36.81 ( $CMe_2$ ), 26.45( $CMe_2$ ), 6.11 ( $SiMe_3$ ).

*Calcium tris-[3-(2-methoxy-1,1-dimethylethyl)pyrazolyl]hydroborate} para-methylphenoxide  $Tp^C \cdot CaOC_6H_4-p-Me$ , 2.* A solution of p-cresol (0.043  $\mu$ l, 1.41 mmol) in 5 ml benzene was added dropwise to the solution of compound **1** (0.265 g, 0.400 mmol) in 5 ml benzene at room

temperature. The reaction mixture was stirred for 2 h, and then all volatile materials were removed under vacuum. The white solid was dried under vacuum. X-ray quality single crystals of compound **2** together with one toluene molecule in the asymmetric unit was obtained from toluene solution at -15 °C. <sup>1</sup>H-NMR (250 MHz, benzene-d<sub>6</sub>) δ: 7.52 (H-5, pz, d, *J* = 3.6 Hz, 3H), 7.26 (H-3, H-5, C<sub>6</sub>H<sub>4</sub>-*p*-Me, d, *J* = 8.2 Hz, 2 H), 6.88 (H-2, H-6, C<sub>6</sub>H<sub>4</sub>-*p*-Me, d, *J* = 8.2 Hz, 2 H), 5.86 (H-4, pz, d, *J* = 3.6 Hz 3H), 3.37 (OMe, s, 9H), 3.35 (CH<sub>2</sub>O, s, 6H), 2.42 (*p*-Me, C<sub>6</sub>H<sub>4</sub>-*p*-Me, s, 3H), 1.25 (CMe<sub>2</sub>, s, 18 H); <sup>13</sup>C{<sup>1</sup>H}-NMR (400 MHz, benzene-d<sub>6</sub>) δ : 160.8 (C-3, pz), 136.2 (C-5, pz), 130.2 (C-3, C-5, C<sub>6</sub>H<sub>4</sub>-*p*-Me), 119.9 (C-2, C-6, C<sub>6</sub>H<sub>4</sub>-*p*-Me), 101.5 (C-4, pz), 83.14 (CH<sub>2</sub>O), 61.31 (OCH<sub>3</sub>), 36.61 (CMe<sub>2</sub>), 26.32 (CMe<sub>2</sub>), 20.94 (*p*-Me, C<sub>6</sub>H<sub>4</sub>-*p*-Me).

*Calcium bis{tris-[3-(2-methoxy-1,1-dimethylethyl)pyrazolyl]hydroborate}, [Tp<sup>C\*</sup>Ca]Tp<sup>C\*</sup>, **3**.*

Compound **1** (1 mmol, 0.672 g) was heated under vacuum at 65 °C for 3 days. Color of the initial solid went from off-white to white upon formation of compound **3**. The <sup>1</sup>H- and <sup>13</sup>C{<sup>1</sup>H}-NMR spectra of the repeatedly recrystallized solid in benzene-d<sub>6</sub> showed signals at 0.413 and 5.45 ppm, respectively, for the SiMe<sub>3</sub> group together with the signals of compound **3**. When one equivalent of Tp<sup>C\*</sup>CaI reacts with one equivalent of KOSiMe<sub>3</sub> or KO<sup>t</sup>Bu in toluene, compound **3** was determined as a major product, which is confirmed by the same <sup>1</sup>H-NMR signals of the Tp<sup>C\*</sup> ligand. <sup>1</sup>H-NMR(400 MHz, benzene-d<sub>6</sub>) δ: 7.52 (d, *J* = 2 Hz, 3H, H-5, pz), 5.86 (d, *J* = 2 Hz, 3H, H-4, pz), 3.47 (s, 9H, OMe), 3.32 (s, 6H, CH<sub>2</sub>O), 1.25 (s, 18H, CMe<sub>2</sub>); <sup>1</sup>H-NMR(250 MHz, chloroform-d) δ: 7.46 (d, *J* = 2 Hz, 3H, H-5, pz), 5.91 (d, *J* = 2 Hz, 3H, H-4, pz), 3.63 (s, 9H, OMe), 3.54 (s, 6H, CH<sub>2</sub>O), 1.35 (s, 18H, CMe<sub>2</sub>); <sup>1</sup>H-NMR(250 MHz, dichloromethane-d<sub>2</sub>) δ: 7.51 (d, *J* = 2 Hz, 6H, H-5, pz), 5.99 (d, *J* = 2 Hz, 6H, H-4, pz), 3.65 (s, 18H, OMe), 3.59 (s, 12H, CH<sub>2</sub>O), 1.38 (s, 18H, CMe<sub>2</sub>); <sup>1</sup>H-NMR(250 MHz, THF-d<sub>8</sub>) δ: 7.46 (d, *J* = 2 Hz, 6H, H-5,

pz), 5.94 (d,  $J = 2$  Hz, 6H, H-4, pz), 3.64 (s, 18H, OMe), 3.58 (s, 12H, CH<sub>2</sub>O), 1.37 (s, 36H, CMe<sub>2</sub>) ; <sup>13</sup>C{<sup>1</sup>H}-NMR (400 MHz, benzene-d<sub>6</sub>)  $\delta$  : 160.5 (C-3, pz), 136.2 (C-5, pz), 101.4 (C-4, pz), 83.43 (CH<sub>2</sub>O), 61.29 (OCH<sub>3</sub>), 36.57 (CMe<sub>2</sub>), 26.44 (CMe<sub>2</sub>); <sup>11</sup>B{<sup>1</sup>H}-NMR (250 MHz, benzene-d<sub>6</sub>) $\delta$ : -2.22 (br); <sup>11</sup>B{<sup>1</sup>H}-NMR (250 MHz, THF-d<sub>8</sub>)  $\delta$ : -2.38 (br).

*Magnesium bis{tris-[3-(2-methoxy-1,1-dimethylethyl)pyrazoly]hydroborate}, [Tp<sup>C\*</sup>Mg]Tp<sup>C\*</sup>, **4**.*

A solution of [(CH<sub>2</sub>)<sub>3</sub>CH<sub>3</sub>]<sub>2</sub>Mg (3.6 mmol, 3.6 ml, 1 M solution in heptane) was added dropwise to the solution of TlTp<sup>C\*</sup> (3.4 mmol, 2.30 g) in 40 ml THF. Immediate formation of Tl metal as a black deposit was observed. The reaction mixture was stirred for 2 h at room temperature. The Tl metal was removed by Schlenk filtration, and the colorless supernatant solution was stripped to dryness under vacuum. Compound **4** was obtained as white solid (1.09 g, 66.1 % experimental yield based on the initial TlTp<sup>C\*</sup>). Colorless single crystals were obtained from the concentrated solution of compound **4** in n-hexane at room temperature. <sup>1</sup>H-NMR(400 MHz, benzene-d<sub>6</sub>)  $\delta$ : 7.34 (br, 3H, H-5, pz), 7.26 (d,  $J =$  Hz, 3H, H-5, pz), 6.27 (br, 3H, H-5, pz), 5.58 (d,  $J = 2$  Hz, 3H, H-4, pz), 3.86 (s, 9H, OMe), 3.67 (br, 6H, CH<sub>2</sub>O), 3.54 (s, 6H, CH<sub>2</sub>O), 3.20 (br, 9H, OMe), 1.71 (br, 18H, CMe<sub>2</sub>), 0.873 (s, 18H, CMe<sub>2</sub>) ; <sup>13</sup>C{<sup>1</sup>H}-NMR (400 MHz, benzene-d<sub>6</sub>)  $\delta$ : 160.9 (C-3, pz, intense), 158.4 (C-3, pz), 137.1 (C-5, pz), 135.7 (C-5, pz), 101.0 (C-4, pz, intense), 99.90 (C-4, pz), 83.30 (CH<sub>2</sub>O, intense), 83.10 (CH<sub>2</sub>O), 66.07 (OMe), 58.60 (OMe, intense), 37.62 (CMe<sub>2</sub>), 36.20 (CMe<sub>2</sub>, intense), 26.04 (CMe<sub>2</sub>). <sup>11</sup>B{<sup>1</sup>H}-NMR (250 MHz, benzene-d<sub>6</sub>)  $\delta$ : -1.85 (br). Anal. Calcd. for C<sub>48</sub>H<sub>80</sub>B<sub>2</sub>MgN<sub>12</sub>O<sub>6</sub>: C, 59.61; H, 8.34; N, 17.38. Found: C, 59.47; H, 8.32; N, 16.69.

The reaction above was run to obtain Tp<sup>C\*</sup>MgBu so 1.05 eq. of MgBu<sub>2</sub> was reacted with 1.00 equivalent of TlTp<sup>C\*</sup>. When 2 eq. of TlTp<sup>C\*</sup> reacts with 1 equivalent of MgBu<sub>2</sub> in THF,

compound **4** is obtained in quantitative yield according to the following procedure: To a solution of  $\text{TiTp}^{\text{C}*}$  (2.38g, 3.52 mmol) in 25 ml of THF was added dropwise the solution of  $\text{MgBu}_2$  (1.76 mmol, 1 ml of 1M solution in n-heptane) at room temperature. The reaction mixture turned gray and then Ti metal was accumulated at the bottom of the Schlenk flask. The reaction mixture was stirred overnight. The solution was filtered, volatiles were removed under vacuum. A gray solid residue was obtained. It was redissolved in n-hexane, filtered and compound **4** was recrystallized from the concentrated n-hexane solution at room temperature (1.46 g, 83.0 %).

#### *Spin Saturation Transfer Experiments*

VT  $^{13}\text{C}$   $\{^1\text{H}\}$ -NMR spin saturation transfer experiments were carried out on compound **4** in toluene- $\text{d}_8$ . Two sets of  $^{13}\text{C}$  signals were observed for the  $\text{Tp}^{\text{C}*}$  ligands corresponding to  $[\text{Tp}^{\text{C}*}\text{Mg}]^+$  and  $[\text{Tp}^{\text{C}*}]^-$  though an absolute assignment of coordinated and free  $\text{Tp}^{\text{C}*}$  signals has not been made at this time. The  $\text{OCH}_3$  signals with chemical shifts at 66.0 and 58.7 ppm and well separated and were employed in the irradiation experiments. Irradiation of the signal at 66.0 ppm and examination of the signal at 58.7 ppm revealed spin transfer with increasing temperature as shown in Figure 4. Irradiation of the signal at 58.7 ppm also gave rise to the decrease in intensity of the signal at 66.0 ppm with increasing temperature. These experiments confirm the exchange of free and coordinated  $\text{Tp}^{\text{C}*}$  ligands.

#### References

1. M. H. Chisholm, J. C. Gallucci and G. Yaman. *Inorg. Chem.* **2007**, 46(21), 8676-8683.
2. P. S. Tanner, D. J. Burkey and T. P. Hanusa. *Polyhedron* **1995**, 14, 331-333.
3. R. A. Anderson and G. Wilkinson. *Inorg. Synth.* **1979**, 19, 262.

4. Dr. Maren Pink of Indiana University collected the synchrotron data set at the Advanced Photon Source at the beamline ChemMatCARS Sector 15. This beamline is principally supported by the National Science Foundation/Department of Energy under grant number CHE0087817 and by the Illinois Board of Higher Education. The Advanced Photon Source is supported by the US Department of Energy, Basic Energy Sciences, Office of Science, under Contract No. W-31-109-Eng-38.
5. SHELXS-97: G. M. Sheldrick, *Acta Cryst.*, 2008, A64, 112-122.
6. SIR2004: M. C. Burla, R. Caliendo, M. Camalli, B. Carrozzini, G. L. Cascarano, L. DeCaro, C. Giacovazzo, G. Polindori, R. Spagna, *J. Appl. Cryst.*, 2005, 38, 381-388.
7. SHELXL-97: G. M. Sheldrick, *Acta Cryst.*, 2008, A64, 112-122.
8. *WinGX-Version 1.64.05*: Farrugia, L. J. *J. Appl. Cryst.* **1999**, 32, 837-838.

**Table S1.** Summary of crystallographic data for compounds **1-4**.

|         | <b>1</b>                                                                         | <b>2</b>                                                                        | <b>3</b>                                                                        | <b>4</b>                                                                        |
|---------|----------------------------------------------------------------------------------|---------------------------------------------------------------------------------|---------------------------------------------------------------------------------|---------------------------------------------------------------------------------|
| Formula | C <sub>30</sub> H <sub>58</sub> BCaN <sub>7</sub> O <sub>3</sub> Si <sub>2</sub> | C <sub>31</sub> H <sub>47</sub> BCaN <sub>6</sub> O <sub>4</sub><br>and toluene | C <sub>48</sub> H <sub>80</sub> B <sub>2</sub> CaN <sub>12</sub> O <sub>6</sub> | C <sub>48</sub> H <sub>80</sub> B <sub>2</sub> MgN <sub>12</sub> O <sub>6</sub> |

|                     |                         |                       |                    |                    |
|---------------------|-------------------------|-----------------------|--------------------|--------------------|
| Formula Wt.         | 671.90                  | 710.77                | 982.94             | 967.17             |
| Crystal System      | monoclinic              | monoclinic            | monoclinic         | triclinic          |
| a/Å                 | 13.1496(5)              | 13.390(1)             | 14.2546(2)         | 14.3126(1)         |
| b/Å                 | 15.5703(8)              | 15.831(1)             | 16.7217(3)         | 14.5131(2)         |
| c/Å                 | 18.9206(8)              | 19.583(2)             | 24.6146(5)         | 14.9368(2)         |
| $\alpha/^\circ$     |                         |                       |                    | 97.536(1)          |
| $\beta/^\circ$      | 99.351(2)               | 109.058(3)            | 102.840(1)         | 115.884(1)         |
| $\gamma/^\circ$     |                         |                       |                    | 99.546(1)          |
| U/Å <sup>3</sup>    | 3822.4(3)               | 3923.6(6)             | 5720.4(2)          | 2679.34(5)         |
| T/K                 | 95(2)                   | 150(2)                | 230(2)             | 150(2)             |
| wavelength          | 0.49595 Å               | 0.71073               | 0.71073            | 0.71073            |
| Space Group         | P2 <sub>1</sub> /c      | P2 <sub>1</sub> /n    | P2 <sub>1</sub> /c | Pī                 |
| Z                   | 4                       | 4                     | 4                  | 2                  |
| crystal size, mm    | 0.07 x 0.06 x <<br>0.01 | 0.38 x 0.35 x<br>0.12 | 0.38 x 0.12 x 0.12 | 0.27 x 0.19 x 0.15 |
| $\mu\text{mm}^{-1}$ | 0.080                   | 0.205                 | 0.163              | 0.090              |
| Reflections         | 42864                   | 63707                 | 51480              | 47258              |
| Measured            |                         |                       |                    |                    |
| Unique refl., Rint  | 10864, 0.0513           | 6918, 0.039           | 7420, 0.085        | 9449, 0.038        |
| R1(I>2 $\sigma$ I)  | 0.0447                  | 0.0397                | 0.0885             | 0.0912             |
| wR2(all data)       | 0.1117                  | 0.1025                | 0.2589             | 0.2891             |

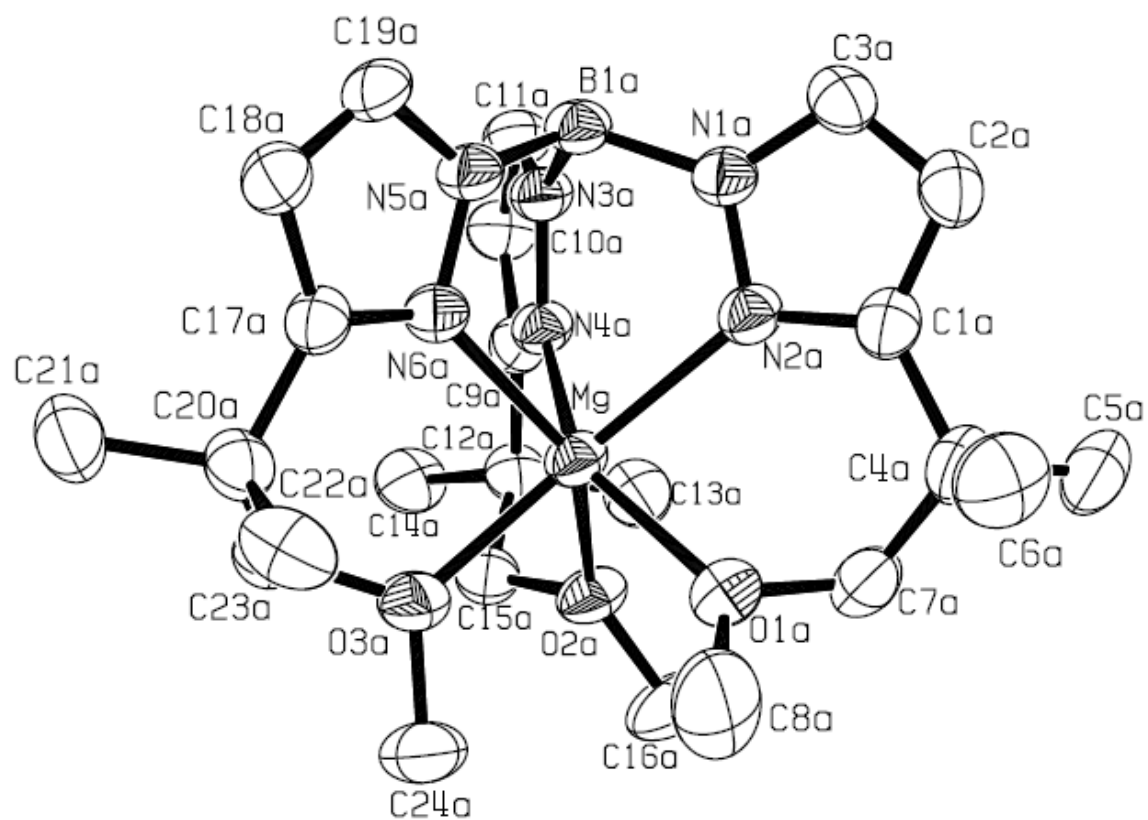

An ORTEP drawing of the [TpC\*Mg]<sup>+</sup> cation of IV, with thermal ellipsoids drawn at the 50% probability level. The hydrogen atoms are omitted for clarity.
